# Supplementary material
Source: PubMed Central journal article supplement (PMC2614768)
Supplement: 0809966105_0809966105SI.pdf [file 0809966105_0809966105SI.pdf]

# Supporting Information

Kimmelman *et al.* 10.1073/pnas.0809966105

## SI Methods

**Plasmids.** The full-length RIOK3 coding sequence was amplified from cDNA and fused in frame with an N-terminal HA tag and cloned into the pBabe puro retroviral vector or in a MSCV blasticidin retroviral vector. The S447L mutant was made by amplification of the coding sequence from cDNA derived from the HPAFII cell line which harbored the sequence variant. The K290R and D406N constructs were made by standard site directed mutagenesis protocols. Constructs were sequenced to ensure authenticity. Viral particles produced in 293T cells, filtered, and used for infection in the presence of 5  $\mu$ g/ml polybrene (Sigma). Cells were selected 2 days later using puromycin (2–2.5  $\mu$ g/ml). Knockdown was assessed at 48–72 h after selection.

**Rac Activation Assay.** 293T cells were transfected with 5–10  $\mu$ g of each expression plasmid using Lipofectamine 2000 (Invitrogen). Approximately 36–48 h after transfection, cells were serum starved in 0.1% serum containing media overnight. Between 1–3 mg of lysate were used per pull-down assay using the supplied GST-Pak RBD and incubated for 1 h, washed three times, and then boiled in sample buffer. Western analysis was performed as described in *Methods*.

**Tumorigenicity Assays.** Between 4,000–8,000 cells per well were seeded in medium containing 0.4% low-melting agarose on top of bottom agar containing 1% low-melting agarose in regular medium. After 10–14 d, colonies were stained with iodinitrotetrazoliumchloride (Sigma) and counted with positive colonies scored based on comparison of control colony size. Alternatively plates were stained with Alamar blue and read on a plate reader.

**Invasion and Migration Assays.** The inner portion of the well was scraped clean and then fixed in 10% formalin in PBS and visualized by staining with a 0.1% crystal violet solution. For migration assays, cells were processed by standard crystal violet staining after 7–8 h (overnight for invasion assays) and either direct counting of cells or extraction of crystal violet from the membranes with acetic acid followed by determination of the optical density was performed. For scratch assays, cells were seeded in 6-well plates and allowed to reach confluence. A scratch was made using a sterile p200 pipette tip and photographed 12–16 h later.

**aCGH and FISH.** The oligonucleotide array contains 43,000 elements representing coding and noncoding human sequences (Human Genome CGH 44B, Agilent Technologies, G4410B). Probes were annotated against build NCBI 35. Well-characterized genes represented by 1+ probes, cancer-relevant genes by 2+ probes. The overall median interval between mapped elements is 43 kb and 24-kb median probe spacing in Refseq genes. Selection criteria for high confidence MCRs included the following: High amplitude, Peak segmentation values  $>1.0$  or  $<-1.0$ ; Focal change, Width  $<7$ Mb and Entrez genes in residence  $<100$ . To eliminate events potentially from copy number polymorphism, MCRs with substantial overlap with any of the eight tables in structural variation track on UCSC genome browser (hg17) were removed; MCR inclusion for the final list and boundary definition was subjected to expert visual inspection and review. For FISH, DNA was extracted from BAC clones and labeled by nick-translation mix (Roche Diagnostics). FISH signal evaluation and acquisition were performed manually using filter sets and software developed by Applied Spectral Imaging.

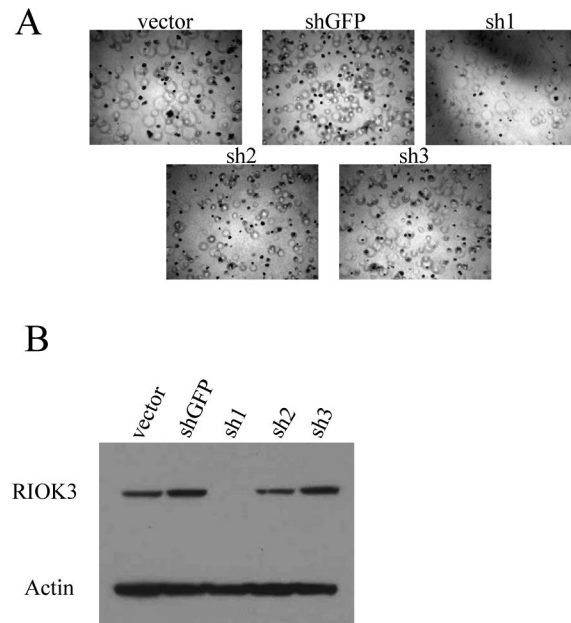

**Fig. 51.** Knockdown of RIOK3 in PDAC cells causes decreased anchorage independence. (A) 8988T cells were transduced with various shRNAs for RIOK3 and controls. These were seeded into semisolid agar and resulting colonies allowed to form. Note the significant reduction of colonies in sh1 cells, correlating with knockdown. (B) Western blot of lines from A. Significant knockdown in the sh1 line correlates with decreased colony formation. Lower band is an actin loading control.

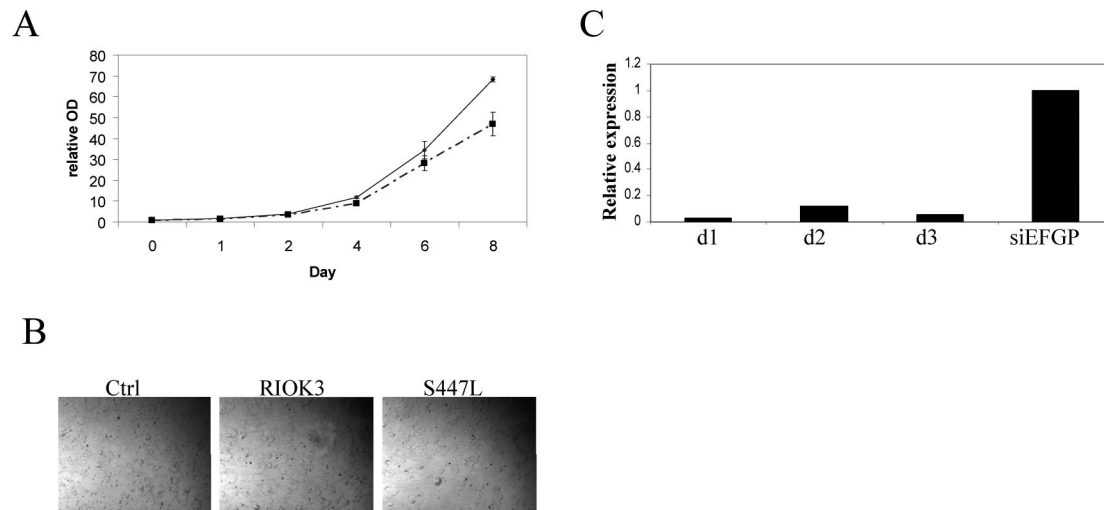

**Fig. S2.** Functional analysis of RIOK3 and PAK4. (A) Growth curves of human pancreatic ductal cells either expressing control vector (top curve) or RIOK3 (lower curve), showing no significant differences in proliferation over eight days. Data are plotted as relative to day 0. Cell number is estimated by amount of crystal violet staining as determined by relative OD from extracted dye. (B) Representative photographs of stable RIOK3 or S447L INK4A/ARF null MEFs seeded in soft agar. Notice no colonies of significant size are present. (C) RTqPCR showing >90% knockdown of PAK4 expression in 8988T cells with three siRNA duplexes, compared to an siEGFP control.

**Table S1. High confidence MCRs**

| Cytobands            | Position, bp |             | Width, bp | Peak (Log <sub>2</sub> ) | Recurrence   |   | No. of Genes | Targets    |
|----------------------|--------------|-------------|-----------|--------------------------|--------------|---|--------------|------------|
|                      | Start        | End         |           |                          | Total Tumors |   |              |            |
| <b>Amplification</b> |              |             |           |                          |              |   |              |            |
| 1p13.1–1p12          | 116,578,180  | 119,327,033 | 2,748,853 | 1.24                     | 1            | 1 | 27           |            |
| 7q11.21–7q11.22      | 62,277,763   | 66,674,506  | 4,396,743 | 1.99                     | 1            | 1 | 69           | SBDS       |
| 7q21.3–7q22.1        | 96,682,860   | 100,133,837 | 3,450,977 | 2.62                     | 3            | 1 | 86           |            |
| 8p11.23–8p11.21      | 39,295,686   | 42,137,387  | 2,841,701 | 1.54                     | 1            | 0 | 18           |            |
| 8q24.13–8q24.21      | 124,210,606  | 130,926,595 | 6,715,989 | 2.14                     | 5            | 0 | 42           | MYC        |
| 9p13.3–9p13.2        | 35,602,907   | 36,620,296  | 1,017,389 | 2.35                     | 2            | 1 | 32           |            |
| 12q12–12q13.11       | 43,854,614   | 45,756,535  | 1,901,921 | 2.15                     | 2            | 1 | 10           |            |
| 12q24.31–12q24.32    | 120,795,122  | 127,205,234 | 6,410,112 | 1.46                     | 1            | 0 | 64           | BCL7A      |
| 17q12–17q21.2        | 34,881,044   | 37,255,292  | 2,374,248 | 2.53                     | 6            | 1 | 86           | ERBB2,RARA |
| 17q23.2–17q23.3      | 57,378,553   | 59,088,916  | 1,710,363 | 3.81                     | 1            | 0 | 20           |            |
| 18q11.2              | 17,574,014   | 19,999,081  | 2,425,067 | 2.49                     | 4            | 2 | 18           |            |
| 19q12                | 34,522,574   | 35,707,747  | 1,185,173 | 3.19                     | 3            | 2 | 10           |            |
| 19q13.2              | 44,142,487   | 44,603,715  | 461,228   | 1.49                     | 4            | 1 | 17           |            |
| 19q13.2              | 44,721,427   | 46,436,894  | 1,715,468 | 2.51                     | 2            | 1 | 56           | AKT2       |
| 20p11.22–20p11.21    | 22,015,808   | 24,171,157  | 2,155,349 | 1.90                     | 3            | 1 | 31           |            |
| <b>Deletion</b>      |              |             |           |                          |              |   |              |            |
| 1p36.13              | 16,040,284   | 16,439,902  | 399,618   | -1.69                    | 2            | 1 | 14           |            |
| 2p21                 | 44,051,319   | 44,170,341  | 119,022   | -1.46                    | 1            | 1 | 1            |            |
| 4q35.1–4q35.2        | 187,071,600  | 187,989,101 | 917,501   | -1.51                    | 2            | 0 | 11           |            |
| 5q12.3               | 64,303,384   | 64,805,843  | 502,459   | -1.20                    | 2            | 0 | 3            |            |
| 5q34                 | 165,451,579  | 167,200,035 | 1,748,456 | -1.95                    | 1            | 0 | 3            |            |
| 6p21.32              | 32,435,603   | 32,821,066  | 385,463   | -1.35                    | 2            | 0 | 10           |            |
| 6q23.1–6q23.2        | 131,354,338  | 131,522,922 | 168,584   | -1.24                    | 4            | 0 | 1            |            |
| 6q25.3               | 155,868,335  | 157,478,353 | 1,610,018 | -4.42                    | 5            | 0 | 3            |            |
| 7q31.1               | 109,897,403  | 110,325,325 | 427,922   | -1.41                    | 1            | 0 | 3            |            |
| 8p22–8p21.3          | 17,845,554   | 19,297,165  | 1,451,611 | -1.65                    | 7            | 0 | 11           | PCM1       |
| 9p24.3–9p24.2        | 720,061      | 3,718,474   | 2,998,413 | -5.21                    | 7            | 0 | 16           |            |
| 9p22.1–9p21.3        | 19,716,229   | 20,300,541  | 584,312   | -3.72                    | 5            | 0 | 1            |            |
| 9p21.3               | 21,795,300   | 22,889,614  | 1,094,314 | -5.60                    | 10           | 1 | 6            | CDKN2A     |
| 9q21.2               | 77,373,718   | 77,863,757  | 490,039   | -1.84                    | 3            | 1 | 2            |            |
| 9q22.31              | 92,816,518   | 93,140,559  | 324,041   | -1.89                    | 2            | 1 | 5            |            |
| 9q32–9q33.1          | 114,473,507  | 114,894,977 | 421,470   | -2.23                    | 2            | 0 | 5            |            |
| 10p13–10p12.31       | 13,254,674   | 18,874,858  | 5,620,184 | -3.01                    | 3            | 0 | 36           |            |
| 11p15.3              | 11,862,668   | 12,186,068  | 323,400   | -2.76                    | 2            | 0 | 4            |            |
| 16q12.1–16q12.2      | 47,965,378   | 51,807,641  | 3,842,263 | -1.30                    | 2            | 0 | 27           | CYLD       |
| 16q23.1              | 76,981,706   | 77,573,238  | 591,533   | -1.28                    | 3            | 0 | 2            |            |
| 18q21.1              | 46,480,734   | 47,708,308  | 1,227,574 | -6.47                    | 7            | 0 | 8            | SMAD4      |
| 18q21.2              | 49,190,910   | 50,063,290  | 872,380   | -6.25                    | 7            | 0 | 4            |            |
| 18q23                | 73,464,159   | 74,719,405  | 1,255,246 | -2.85                    | 5            | 1 | 10           |            |
| 21q22.3              | 41,725,601   | 42,564,265  | 838,664   | -1.77                    | 3            | 0 | 13           |            |

**Table S2. Downstream kinases in the Rho family**

| sym      | chr | start     | end       |
|----------|-----|-----------|-----------|
| PAK1     | 11  | 76710708  | 76862581  |
| PAK2     | 3   | 197951312 | 198043756 |
| PAK3     | X   | 110226256 | 110350816 |
| PAK4     | 19  | 44308260  | 44363829  |
| MAP3K9   | 14  | 70264605  | 70345641  |
| MAP3K10  | 19  | 45389491  | 45413314  |
| MAP3K11  | 11  | 65121802  | 65138296  |
| KIAA1804 | 1   | 231530137 | 231586374 |
| ROCK1    | 18  | 16787533  | 16944869  |
| ROCK2    | 2   | 11239229  | 11402162  |
